# Supplementary material for: Change in alcohol consumption and physical activity during the COVID-19 pandemic amongst 76 medical students
Source: PeerJ journal article supplement (doi:10.7717/peerj.12580), 2021-12-09
Supplement: File_S3.pdf [file File_S3.pdf]

Ikä

Sukupuoli

- Mies
- Nainen

Asutko?

- Yksin
- Jonkun kanssa

Kuuluuko talouteesi koira?

- Kyllä
- Ei

Onko sinulla alle 18-vuotiaita lapsia?

- Kyllä
- Ei

Oletko kilpaurheilija?

- Kyllä
- Ei

Kuinka paljon olet keskimäärin liikkunut viikossa ennen korona-aikaa? (ennen maaliskuu 2020)

|                                      | Ei lainkaan | Alle 30 min | Noin tunti | 2-3 tuntia | 4 tuntia tai enemmän |
|--------------------------------------|-------------|-------------|------------|------------|----------------------|
| Kävelyä vastaavaa liikuntaa          |             |             |            |            |                      |
| Reipasta kävelyä vastaavaa liikuntaa |             |             |            |            |                      |
| Kevyttä hölkkää vastaavaa liikuntaa  |             |             |            |            |                      |
| Reipasta juoksua vastaavaa liikuntaa |             |             |            |            |                      |

Kuinka paljon olet keskimäärin liikkunut viikossa korona-aikana? (maaliskuu 2020 jälkeen)

|  | Ei lainkaan | Alle 30 min | Noin tunti | 2-3 tuntia | 4 tuntia tai enemmän |
|--|-------------|-------------|------------|------------|----------------------|
|--|-------------|-------------|------------|------------|----------------------|

|                                               |  |  |  |  |  |
|-----------------------------------------------|--|--|--|--|--|
| Kävelyä<br>vastaavaa<br>liikuntaa             |  |  |  |  |  |
| Reipasta<br>kävelyä<br>vastaavaa<br>liikuntaa |  |  |  |  |  |
| Kevyttä<br>hölkkää<br>vastaavaa<br>liikuntaa  |  |  |  |  |  |
| Reipasta<br>juoksua<br>vastaavaa<br>liikuntaa |  |  |  |  |  |

Onko sinulle korona-aikana (maaliskuu 2020 jälkeen) sattunut vammoja tai sairastumisia, jotka ovat vaikuttaneet liikunnan määrään?

- Kyllä
- Ei

Alkoholinkäyttö ennen korona aikaa (maaliskuu 2020)

Kuinka monta kertaa viikossa olet keskimäärin käyttänyt alkoholia ennen korona-aikaa?

Kuinka monta alkoholiannosta kerralla olet keskimäärin käyttänyt ennen korona-aikaa? (yksi alkoholiannos on esimerkiksi pullo keskiolutta, 12 cl viiniä tai 4 cl väkeviä)

Alkoholinkäyttö korona-aikana (maaliskuu 2020 jälkeen)

Kuinka monta kertaa viikossa olet keskimäärin käyttänyt alkoholia korona-aikana ?

Kuinka monta alkoholiannosta kerralla olet keskimäärin käyttänyt korona-aikana? (yksi alkoholiannos on esimerkiksi pullo keskiolutta, 12 cl viiniä tai 4 cl väkeviä)
