# Supplementary material for: Change in alcohol consumption and physical activity during the COVID-19 pandemic amongst 76 medical students
Source: PeerJ journal article supplement (doi:10.7717/peerj.12580), 2021-12-09
Supplement: File_S4.pdf [file File_S4.pdf]

1. Age
2. Gender
  - a. Man
  - b. Woman
3. Do you live
  - a. Alone
  - b. With someone
4. Does your household include a dog?
  - a. Yes
  - b. No.
5. Do you have children under 18?
  - a. Yes
  - b. No.
6. Are you a competitive athlete?
  - a. Yes
  - b. No.
7. On average, how much have you had recreational physical activity in the week before COVID time (Before March 2020)?

| Intensity<br>(Mark all four options) | Amount per week, MET units |         |        |             |           |
|--------------------------------------|----------------------------|---------|--------|-------------|-----------|
|                                      | None                       | <½ hour | 1 hour | 2 – 3 hours | ≥ 4 hours |
| Normal walking or respective         |                            |         |        |             |           |
| Brisk walking or respective          |                            |         |        |             |           |
| Light jogging or respective          |                            |         |        |             |           |
| Brisk jogging or respective          |                            |         |        |             |           |

8. On average, how much have you had recreational physical activity in the week during COVID time (After March 2020)?

| Intensity<br>(Mark all four options) | Amount per week, MET units |         |        |             |           |
|--------------------------------------|----------------------------|---------|--------|-------------|-----------|
|                                      | None                       | <½ hour | 1 hour | 2 – 3 hours | ≥ 4 hours |
| Normal walking or respective         |                            |         |        |             |           |
| Brisk walking or respective          |                            |         |        |             |           |
| Light jogging or respective          |                            |         |        |             |           |
| Brisk jogging or respective          |                            |         |        |             |           |

9. During the COVID period (after March 2020), have you had any injuries or illnesses that have affected the amount of physical exercise?
- Yes
  - No
10. Alcohol use before COVID time (March 2020)
- On average, how many times a week have you consumed alcohol before COVID time?
  - On average, how many doses of alcohol at a time have you used before Korona time?  
(One serving of alcohol is, for example, a bottle of medium beer, 12 cl of wine or 4 cl of strong liqueur)
11. Alcohol use during the COVID period (after March 2020)
- On average, how many times a week have you consumed alcohol during COVID?
  - On average, how many doses of alcohol have you consumed at one time during Korona? (One serving of alcohol is, for example, a bottle of medium beer, 12 cl of wine or 4 cl of strong liqueur)
